# Supplementary material
Source: PubMed Central journal article supplement (PMC5638120)
Supplement: NIHMS854291-supplement-supplement_1.pdf [file NIHMS854291-supplement-supplement_1.pdf]

Supplemental Table 1. RA status and baseline variables

|                       | Anti-CCP-<br>/DMARD* use |      | Anti-CCP+/no<br>DMARD use |      | Anti-<br>CCP+/DMARD<br>use |      | Anti-CCP-/no<br>DMARD use |      | No RA  |      |
|-----------------------|--------------------------|------|---------------------------|------|----------------------------|------|---------------------------|------|--------|------|
|                       | N                        | %    | N                         | %    | N                          | %    | N                         | %    | N      | %    |
|                       | <b>Age</b>               |      |                           |      |                            |      |                           |      |        |      |
| 50-59                 | 56                       | 25.8 | 166                       | 30.9 | 79                         | 28.7 | 2687                      | 30.0 | 44708  | 33.4 |
| 60-69                 | 103                      | 47.5 | 249                       | 46.4 | 132                        | 48.0 | 4004                      | 44.7 | 60222  | 45.0 |
| 70-79                 | 58                       | 26.7 | 122                       | 22.7 | 64                         | 23.3 | 2267                      | 25.3 | 28811  | 21.5 |
| <b>Ethnicity</b>      |                          |      |                           |      |                            |      |                           |      |        |      |
| Black                 | 41                       | 18.9 | 188                       | 35.0 | 47                         | 17.1 | 2166                      | 24.2 | 11466  | 8.6  |
| Hispanic              | 5                        | 2.3  | 48                        | 8.9  | 18                         | 6.6  | 987                       | 11.0 | 4983   | 3.7  |
| White                 | 171                      | 78.8 | 301                       | 56.1 | 210                        | 76.4 | 5805                      | 64.8 | 117292 | 87.7 |
| <b>Education</b>      |                          |      |                           |      |                            |      |                           |      |        |      |
| ≤ High school         | 57                       | 26.4 | 162                       | 30.6 | 57                         | 21.0 | 2885                      | 32.5 | 28485  | 21.5 |
| Some college          | 83                       | 38.4 | 213                       | 40.3 | 121                        | 44.7 | 3477                      | 39.2 | 20113  | 37.8 |
| ≥ College             | 76                       | 35.2 | 154                       | 29.1 | 93                         | 34.3 | 2503                      | 28.2 | 54161  | 40.8 |
| <b>Smoking</b>        |                          |      |                           |      |                            |      |                           |      |        |      |
| Never                 | 96                       | 44.7 | 206                       | 39.2 | 113                        | 41.7 | 4505                      | 51.1 | 66630  | 50.4 |
| Past                  | 104                      | 48.4 | 245                       | 46.6 | 138                        | 50.9 | 3557                      | 40.4 | 56458  | 42.7 |
| Current               | 15                       | 7.0  | 75                        | 14.3 | 20                         | 7.4  | 751                       | 8.5  | 9095   | 6.9  |
| <b>General health</b> |                          |      |                           |      |                            |      |                           |      |        |      |
| Excellent/very good   | 50                       | 23.2 | 177                       | 33.4 | 59                         | 21.8 | 3338                      | 37.6 | 80457  | 60.5 |
| Good                  | 108                      | 50.0 | 223                       | 42.1 | 125                        | 46.1 | 3640                      | 41.1 | 42353  | 31.8 |
| Fair/poor             | 58                       | 26.9 | 130                       | 24.5 | 87                         | 32.1 | 1890                      | 21.3 | 10243  | 7.7  |
| <b>Hypertension</b>   |                          |      |                           |      |                            |      |                           |      |        |      |
| No                    | 123                      | 57.5 | 316                       | 59.2 | 183                        | 67.0 | 4843                      | 54.7 | 89578  | 67.3 |
| Yes                   | 91                       | 42.5 | 218                       | 40.8 | 90                         | 33.0 | 4005                      | 45.3 | 43463  | 32.7 |

Supplemental Table 1 cont'd

|                            |     |      |     |      |     |      |      |      |        |       |
|----------------------------|-----|------|-----|------|-----|------|------|------|--------|-------|
| <b>Diabetes</b>            |     |      |     |      |     |      |      |      |        |       |
| No                         | 191 | 88.0 | 496 | 92.4 | 259 | 94.2 | 7990 | 89.3 | 126399 | 94.6  |
| Yes                        | 26  | 12.0 | 41  | 7.6  | 16  | 5.8  | 962  | 10.8 | 7266   | 5.4   |
| <b>CHD at baseline</b>     |     |      |     |      |     |      |      |      |        |       |
| No                         | 192 | 88.5 | 491 | 91.4 | 248 | 90.2 | 7684 | 85.8 | 125372 | 93.7  |
| Yes                        | 25  | 11.5 | 46  | 8.6  | 27  | 9.8  | 1274 | 14.2 | 8369   | 6.3   |
| <b>Stroke at baseline</b>  |     |      |     |      |     |      |      |      |        |       |
| No                         | 214 | 98.6 | 526 | 98.0 | 270 | 98.2 | 8735 | 97.5 | 132060 | 98.8  |
| Yes                        | 3   | 1.4  | 11  | 2.1  | 5   | 1.8  | 222  | 2.5  | 1646   | 1.2   |
| <b>BMI &gt;30</b>          |     |      |     |      |     |      |      |      |        |       |
| 30-34.9                    | 39  | 18.1 | 121 | 22.7 | 43  | 15.7 | 2069 | 23.3 | 24276  | 18.32 |
| 35-39.9                    | 25  | 11.6 | 33  | 6.2  | 26  | 9.5  | 1052 | 11.9 | 9668   | 7.3   |
| 40+                        | 12  | 5.6  | 27  | 5.1  | 6   | 2.2  | 678  | 7.6  | 5014   | 3.8   |
| <b>Total METs per week</b> |     |      |     |      |     |      |      |      |        |       |
| <2.5                       | 77  | 35.7 | 185 | 35.6 | 92  | 33.8 | 2685 | 31.0 | 32359  | 24.9  |
| 2.5-18.4                   | 110 | 50.9 | 240 | 46.2 | 138 | 50.7 | 4241 | 49.0 | 65314  | 50.3  |
| ≥18.25                     | 29  | 13.4 | 95  | 18.3 | 42  | 15.4 | 1728 | 20.0 | 32272  | 24.8  |

**Supplemental Table 2. Characteristics of study sample (N=9,988) according to timing of RA report (baseline or follow-up)**

|                                          | Total       | DMARD use at |            |            |            |             |             |
|------------------------------------------|-------------|--------------|------------|------------|------------|-------------|-------------|
|                                          |             | Anti-CCP+    |            | baseline   |            | Deaths      |             |
|                                          |             | N            | %          | N          | %          | N           | %           |
| <b>RA at both baseline and follow up</b> |             |              |            |            |            |             |             |
| Black                                    | 383         | 70           | 18.3       | 33         | 8.6        | 46          | 12.0        |
| Hispanic                                 | 158         | 21           | 13.3       | 11         | 7.0        | 9           | 5.7         |
| White                                    | 1109        | 149          | 13.4       | 105        | 9.5        | 178         | 16.1        |
|                                          |             | p=0.061      |            | p=0.560    |            | p=0.001     |             |
| <b>RA at baseline only</b>               |             |              |            |            |            |             |             |
| Black                                    | 777         | 79           | 10.2       | 44         | 5.7        | 111         | 14.3        |
| Hispanic                                 | 209         | 20           | 9.6        | 10         | 4.8        | 19          | 9.1         |
| White                                    | 3018        | 273          | 9.05       | 258        | 8.5        | 505         | 16.7        |
|                                          |             | p=0.619      |            | p=0.007    |            | p=0.005     |             |
| <b>RA at follow up only</b>              |             |              |            |            |            |             |             |
| Black                                    | 1282        | 86           | 6.7        | 11         | 0.9        | 114         | 8.9         |
| Hispanic                                 | 691         | 25           | 3.6        | 2          | 0.3        | 39          | 5.6         |
| White                                    | 2354        | 89           | 3.8        | 18         | 0.8        | 304         | 12.9        |
|                                          |             | p=0.0001     |            | p=0.332    |            | p=<0.001    |             |
| <b>Total</b>                             | <b>9981</b> | <b>812</b>   | <b>8.1</b> | <b>492</b> | <b>4.9</b> | <b>1325</b> | <b>13.3</b> |

**Supplemental Table 3. Cause of death by anti-CCP+ or <sup>-</sup> and DMARD use for women who self-reported RA at baseline or baseline and follow up**

|                                        | Anti-CCP+         | Anti-CCP-/DMARD use | Anti-CCP-/No DMARD |
|----------------------------------------|-------------------|---------------------|--------------------|
|                                        | N (%)             | N (%)               | Use                |
|                                        | Total deaths= 120 | Total deaths= 29    | N (%)              |
|                                        |                   |                     | Total deaths = 632 |
| Dementia                               | 2 (1.7)           | 2 (6.9)             | 10 (1.6)           |
| Respiratory                            | 11 (9.2)          | 2 (6.9)             | 42 (6.6)           |
| Pneumonia                              | 4 (3.3)           | 1 (3.4)             | 23 (3.6)           |
| Infection                              | 2 (1.7)           | 0. (0.0)            | 3 (0.5)            |
| Sepsis                                 | 4 (3.3)           | 2 (6.9)             | 12 (11.9)          |
| Renal failure                          | 1 (0.8)           | --                  | 8 (1.3)            |
| Coronary heart disease                 | 23(19.2)          | 9 (31.0)            | 143 (22.6)         |
| Cerebrovascular disease                | 8 (6.7)           | 1 (3.4)             | 48 (7.6)           |
| Congestive heart failure               | 7 (5.8)           | 1 (3.4)             | 12 (1.9)           |
| Other atherosclerosis (not CHD or CVD) | 3 (2.5)           | 0 (0.0)             | 13 (2.1)           |
| Other heart not CHD                    | 1 (0.8)           | 0 (0.0)             | 18 (2.8)           |
| Breast cancer                          | 4 (3.3)           | 0 (0.0)             | 26 (4.1)           |
| Ovarian cancer                         | 3 (2.5)           | 0 (0.0)             | 13 (2.1)           |
| Colon cancer                           | 2 (1.7)           | --                  | 23 (3.6)           |
| Other cancers                          | 23 (19.2)         | 3 (10.3)            | 125 (19.8)         |
| Accident                               | 3 (2.5)           | 1 (3.4)             | 19 (3.0)           |
| All other                              | 19 (15.8)         | 7 (24.1)            | 94 (14.9)          |

Supplemental Table 4. Creatinine levels and RA baseline and percent dead by anti-CCP+/-

|              | Creatinine Levels mg/dl |        |           |        |           |        |       |        | Total |
|--------------|-------------------------|--------|-----------|--------|-----------|--------|-------|--------|-------|
|              | 0.10-0.40               |        | 0.50-0.59 |        | 0.60-0.79 |        | >0.80 |        |       |
|              | N                       | % Dead | N         | % Dead | N         | % Dead | N     | % Dead |       |
| Anti-CCP+    | 121                     | 16     | 112       | 21     | 148       | 12     | 61    | 31     | 442   |
| Anti-CCP-/no | 24                      | 21     | 48        | 23     | 82        | 12     | 36    | 31     | 190   |
| DMARD use    |                         |        |           |        |           |        |       |        |       |

For Peer Review

**Supplemental Figure Legends**

Supplemental Figure 1. Sampling Frame For the Women's Health Initiative Study

Supplemental Figure 2. Mortality at 2009 by Age and Ethnicity Groups, Excluding RA at Follow Up Only

Supplemental Figure 3. Age-adjusted Death Rate by Anti-CCP+, DMARD Use and Joint Pain, Among Women Who Have Not Reported RA

For Peer Review

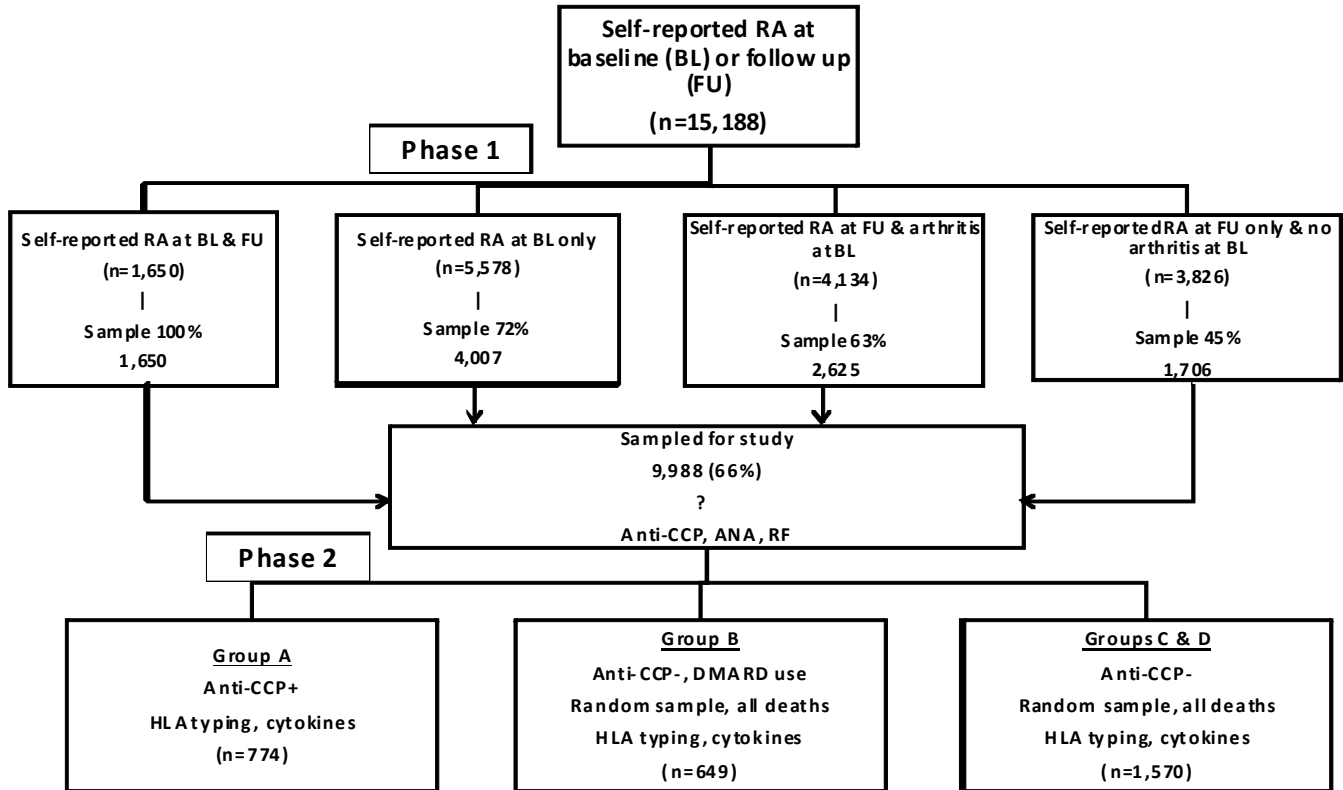

Review

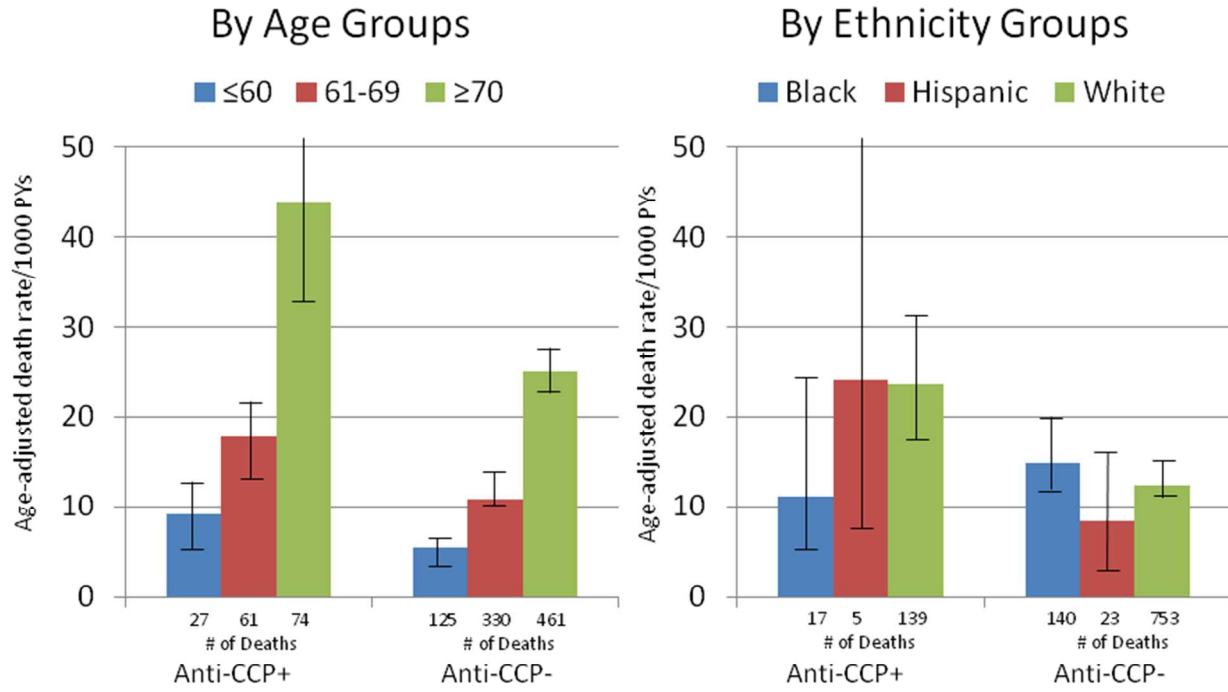

Review



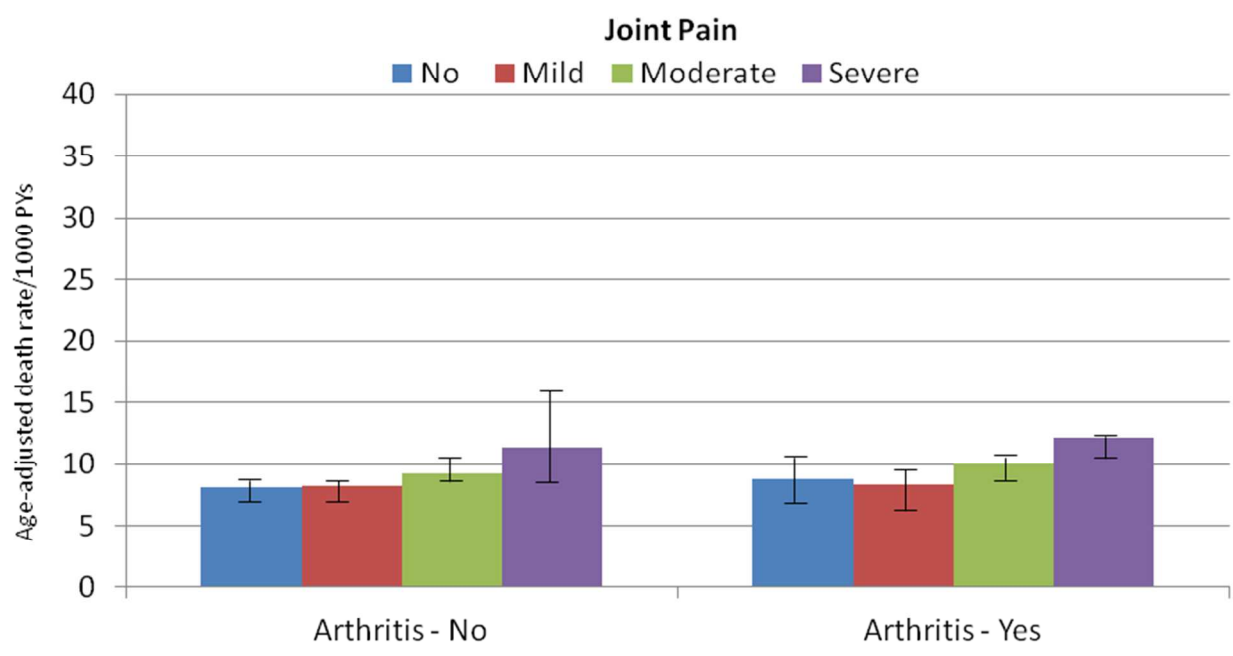

Review

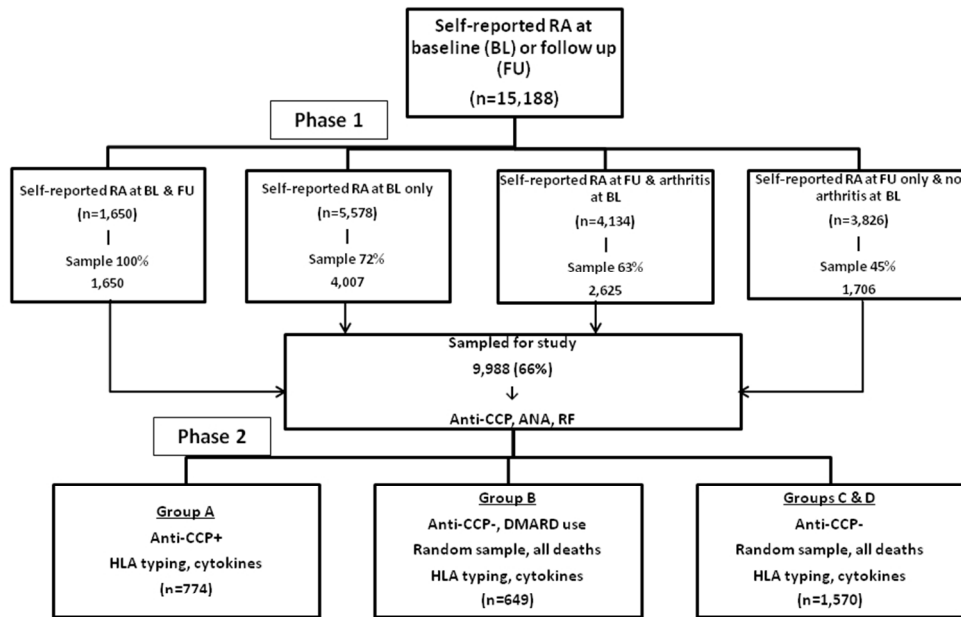

Supplemental Figure 1. Sampling Frame For the Women's Health Initiative Study  
254x190mm (96 x 96 DPI)

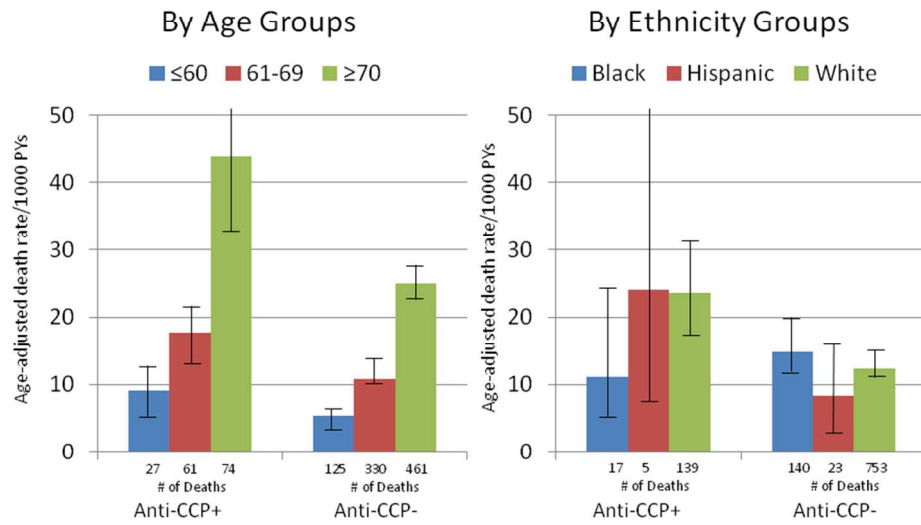

Supplemental Figure 2. Mortality at 2009 by Age and Ethnicity Groups, Excluding RA at Follow Up Only  
254x190mm (96 x 96 DPI)

Review

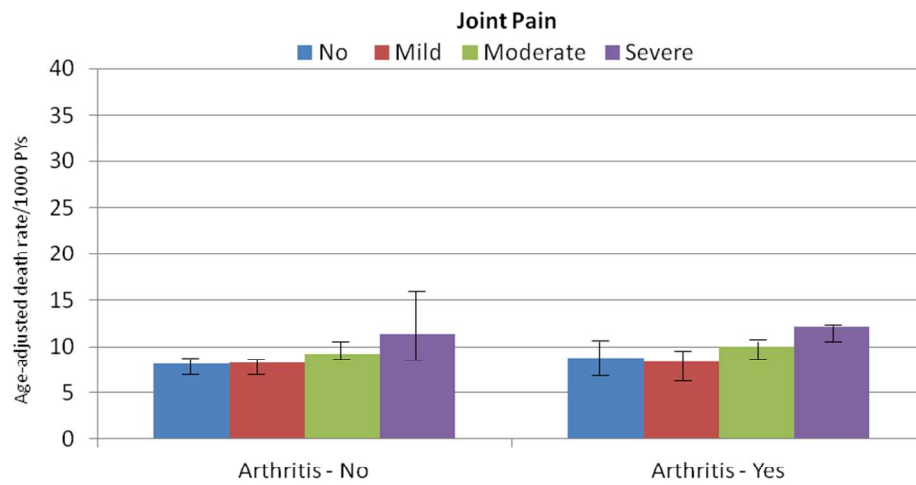

Supplemental Figure 3. Age-adjusted Death Rate by Anti-CCP+, DMARD Use and Joint Pain, Among Women Who Have Not Reported RA  
254x190mm (96 x 96 DPI)

Review
